# Supplementary material for: Insight into the effect of tetrapropylammonium hydroxide on HZSM-5 zeolite and its application in the reaction between 2,5-dimethylfuran and ethanol to p-xylene
Source: Royal Society of Chemistry journal article supplement (doi:10.1039/d2cy01262f), 2022-11-21
Supplement: d2cy01262f1.pdf [file d2cy01262f1.pdf]

## Supporting information

### Insight into the effect of tetrapropylammonium hydroxide on HZSM-5 zeolite and its application in the reaction between 2,5-dimethylfuran and ethanol to *p*-xylene

Rongrong Zhao,<sup>\*a</sup> Juan Sui,<sup>a</sup> Lianchao Wu,<sup>a</sup> Xunzhen Sun,<sup>a</sup> Lekai Fu,<sup>a</sup> Hongzi Tan<sup>a</sup> and Hongyou

Cui<sup>\*a</sup>

[a] School of Chemical Engineering, Shandong University of Technology, 255091 Zibo, China

\*Corresponding author E-mail:rrzhao1990@sdut.edu.cn (R.Zhao); cuihy@sdut.edu.cn (H.Cui)

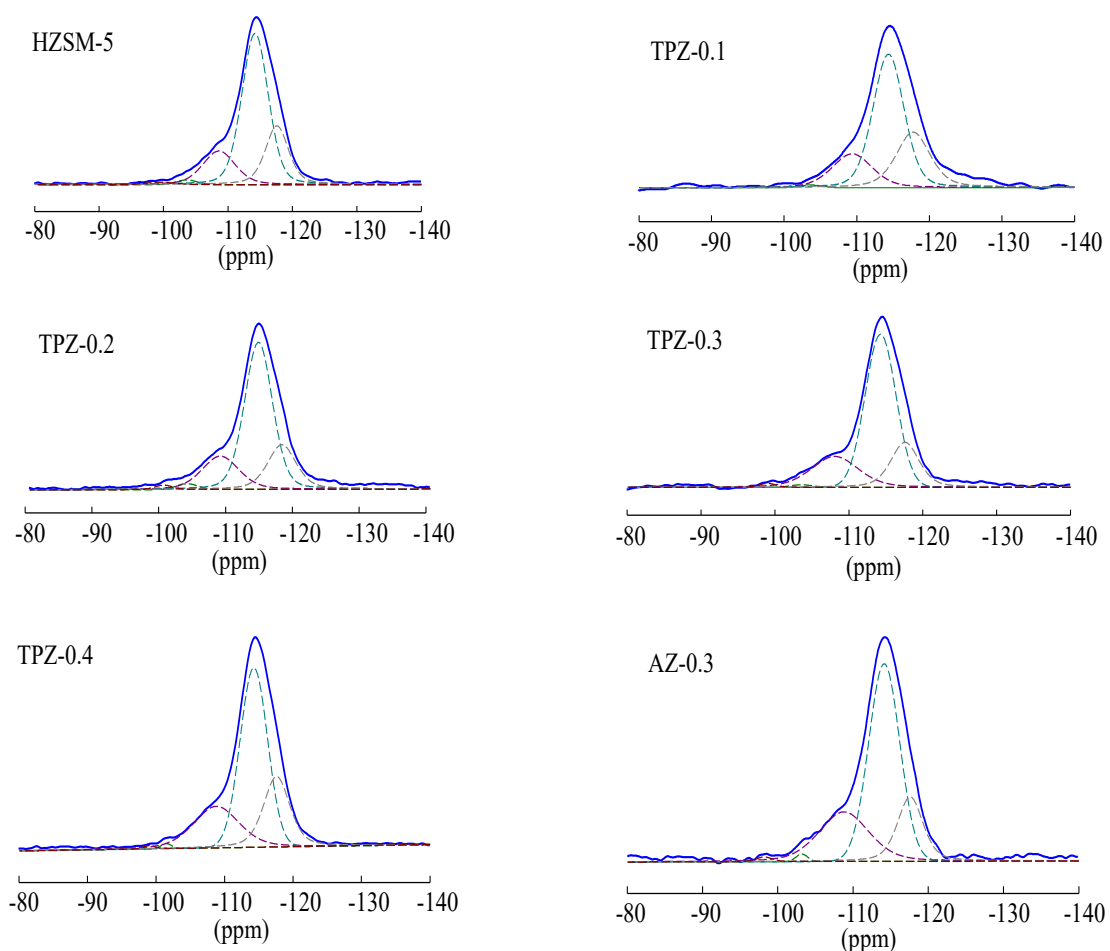

Figure S1 Deconvoluted <sup>29</sup>Si MAS NMR spectra of H-ZSM-5 zeolites before and after alkali modification.

Table S1 The Si distribution and content of different sample derived from <sup>29</sup>Si MAS NMR spectra deconvolution

| sample  | Framework Si/Al ratio <sup>1)</sup> | Si(0Al) <sub>A</sub> site |         | Si(0Al) <sub>B</sub> site |         | Si(1Al) <sub>site</sub> |         | Si(1OH) site |         | Si(2Al) site |         |
|---------|-------------------------------------|---------------------------|---------|---------------------------|---------|-------------------------|---------|--------------|---------|--------------|---------|
|         |                                     | ppm                       | area(%) | ppm                       | area(%) | ppm                     | area(%) | ppm          | area(%) | ppm          | area(%) |
| HZSM-5  | 21                                  | -117.6                    | 21.89   | -114.2                    | 58.99   | -108.6                  | 16.88   | -103.6       | 1.27    | -99.51       | 0.96    |
| TPZ-0.1 | 21                                  | -117.8                    | 24.87   | -114.4                    | 55.30   | -108.9                  | 18.05   | -103.6       | 1.48    | -99.61       | 0.30    |
| TPZ-0.3 | 19                                  | -117.8                    | 19.80   | -114.3                    | 58.91   | -108.6                  | 18.53   | -103.6       | 1.63    | -100.1       | 1.14    |
| TPZ-0.4 | 17                                  | -117.6                    | 18.9    | -114.3                    | 58.68   | -108.1                  | 18.90   | -103.6       | 0.74    | -99.00       | 0.94    |
| TPZ-0.5 | 16                                  | -117.6                    | 23.47   | -114.2                    | 52.42   | -108.8                  | 23.08   | -102.6       | 0.57    | -99.00       | 0.46    |
| AZ-0.3  | 15                                  | -117.6                    | 17.67   | -114.2                    | 55.29   | -108.8                  | 25.52   | -103.6       | 0.76    | -98.60       | 0.76    |

1) The framework Si/Al ratio was calculated by the following formula:

$$\text{Si} / \text{Al}_{\text{NMR}} = \frac{\sum_{n=0}^4 I_{\text{Si}(n\text{Al})}}{\sum_{n=0}^4 0.25n[I_{\text{Si}(n\text{Al})}]}$$

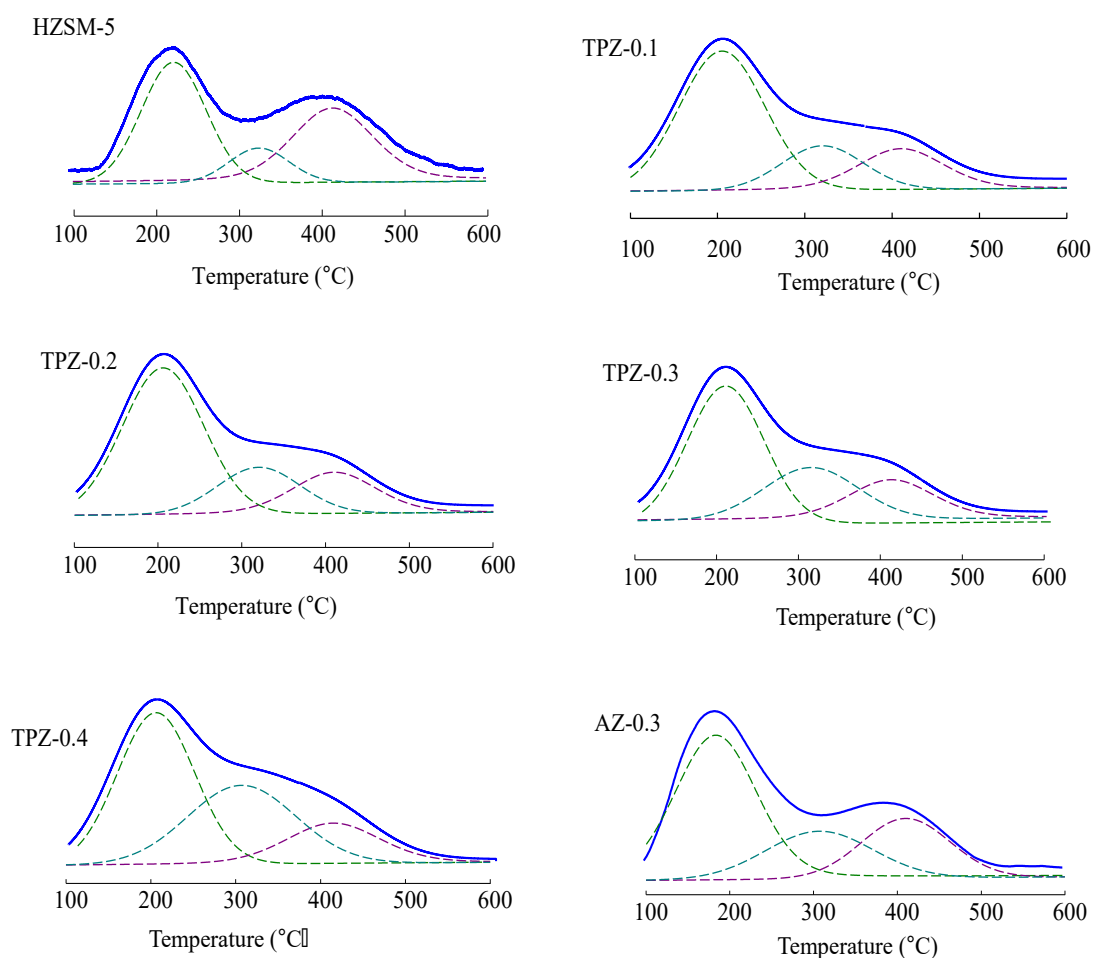

Figure S2 Deconvoluted NH<sub>3</sub>-TPD spectra of H-ZSM-5 zeolites before and after TPAOH and NaOH

modification with different concentration.

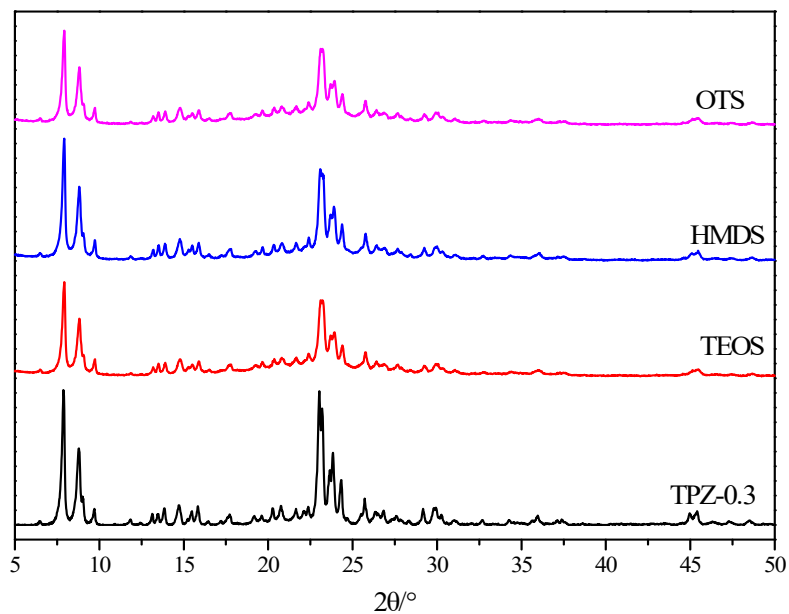

Figure S3 XRD patterns of HZSM-5 modified by 0.3M TPAOH (TPZ-0.3), and its surface modified samples with different silylation agents (TEOS, HMDS and OTS).

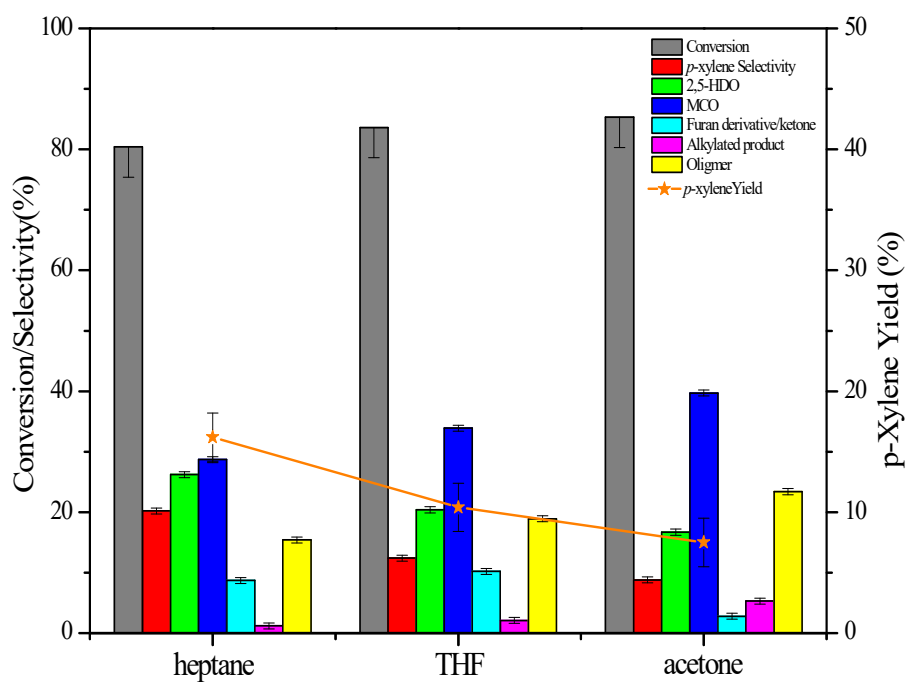

Figure S4 Reaction performances for DMF reaction with ethanol under various solvent. Reaction conditions: 3.75 M reactant (DMF+ethanol) in solvent, molar ratios DMF/ethanol 1:2, temperature 300 °C, reaction time 10 h, 0.4 g HZSM-5 zeolite.

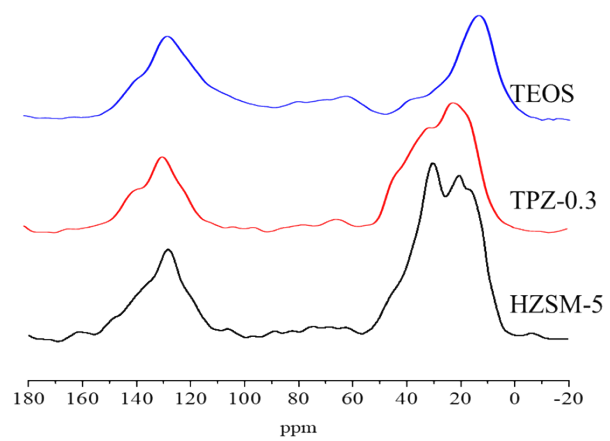

Figure S5  $^{13}\text{C}$  CP/MAS NMR spectra of coked HZSM-5 samples modified by different methods
